# Supplementary material for: Clinical course of tracheobronchopathia osteochondroplastica
Source: PubMed Central journal article supplement — J Thorac Dis. 2020 Oct;12(10):5571–9. doi: 10.21037/jtd-20-1898 (PMC7656356; doi:10.21037/jtd-20-1898), 2020-10
Supplement: jtd-12-10-5571-dss.pdf [file jtd-12-10-5571-dss.pdf]

## Data Sharing Statement

|                     |                                                                                                                                                    |                                                                                                                              |
|---------------------|----------------------------------------------------------------------------------------------------------------------------------------------------|------------------------------------------------------------------------------------------------------------------------------|
| <b>Article Info</b> | http://dx.doi.org/10.21037/jtd-20-1898.                                                                                                            |                                                                                                                              |
| <b>Item</b>         | <b>Question</b>                                                                                                                                    | <b>Authors' Response<br/>(place "-" if not applicable)</b>                                                                   |
| 1                   | Would you like to share data collected for your study to others?                                                                                   | Yes                                                                                                                          |
| 2                   | If not, would you like to share the reason for your decision?                                                                                      | -                                                                                                                            |
| 3                   | What data in particular will be shared?                                                                                                            | Baseline characteristics, treatment details and clinical course will be shared.                                              |
| 4                   | Any other documents will be share? Such as study protocol, statistical analysis plan, informed consent form, clinical study report, analytic code. | Statistical analysis plan, informed consent form, and clinical study report will also be shared if requested.                |
| 5                   | When will data availability begin?                                                                                                                 | From the publication date.                                                                                                   |
| 6                   | When will data availability end?                                                                                                                   | One years within the publication date, since the treatment details or clinical course may be updated over time.              |
| 7                   | To whom will you share the data?                                                                                                                   | Physicians interested in the clinical course of TPO                                                                          |
| 8                   | For what type of analysis or purpose?                                                                                                              | For analysis to evaluate clinical features, treatment and course of progress of TPO patients.                                |
| 9                   | How or where can the data/documents be obtained?                                                                                                   | Emails could be sent to the address below to obtain the shared data:<br>hjk3425@skku.edu                                     |
| 10                  | Any other restrictions?                                                                                                                            | The datasets used and/or analyzed during the current study are available from the corresponding author on reasonable request |
